# Supplementary material for: Deficiency of caspase 3 in tumor xenograft impairs therapeutic effect of measles virus Edmoston strain
Source: PubMed Central journal article supplement (PMC4599253; doi:10.18632/oncotarget.3496), 2015-03-26
Supplement: oncotarget-06-16019-s001.pdf [file oncotarget-06-16019-s001.pdf]

## SUPPLEMENTARY FIGURES

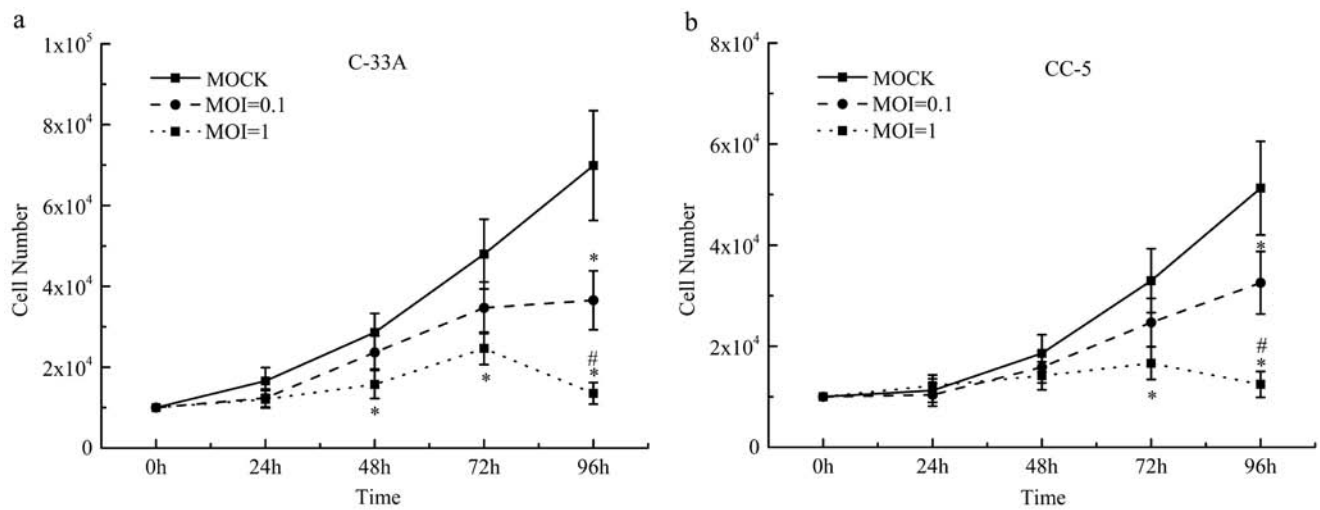

**Supplementary Figure S1: Cell Counts *in Vitro*.** Cell counts assay was performed to evaluate the number of cells by Trypan Blue Staining. All data were presented as means  $\pm$  SD. \*means  $P < 0.05$  when compared to MOCK group.

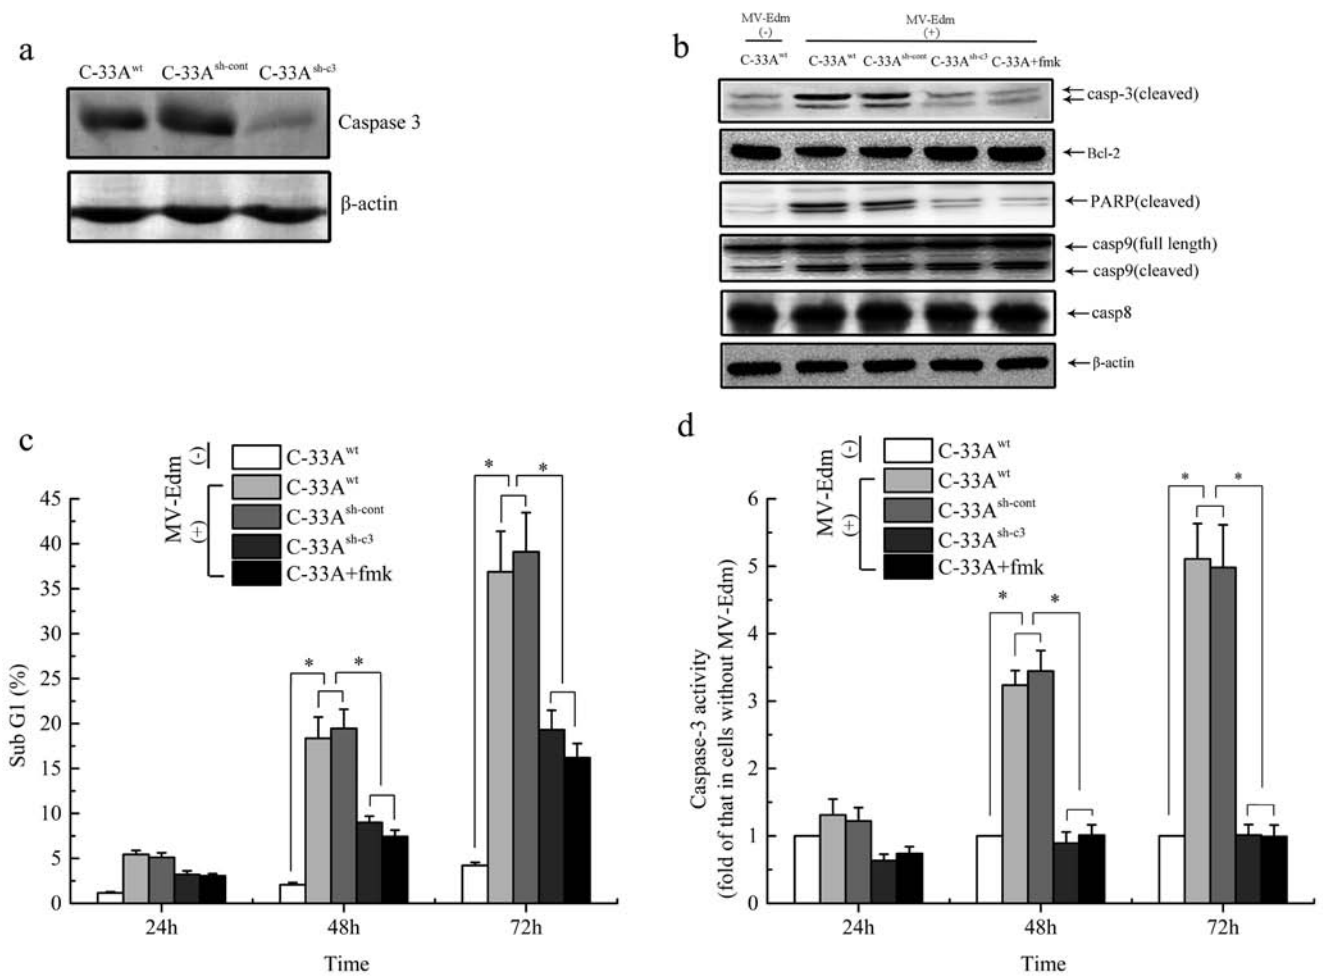

**Supplementary Figure S2: Role of Caspase-3 in the cellular apoptosis induced by MV-Edm infection in C-33A cells.** **a.** C-33A cells were transfected with scramble shRNA or shRNA specific against Caspase-3 (sh-c3), and western blot analysis was performed using the indicated antibodies. **b.** At 72 h, protein levels of Bcl-2, cleaved caspase-3 and PARP in the infected and uninfected C-33A cells were analyzed with Western Blot. **c.** The percentage of sub-G1 cells was measured by fluorescence-activated cell sorting. **d.** At indicated times, the activity of caspase-3 from each group was determined using caspase-3 activity Kit. Data were presented as means ± SD. \*means  $P < 0.05$ .

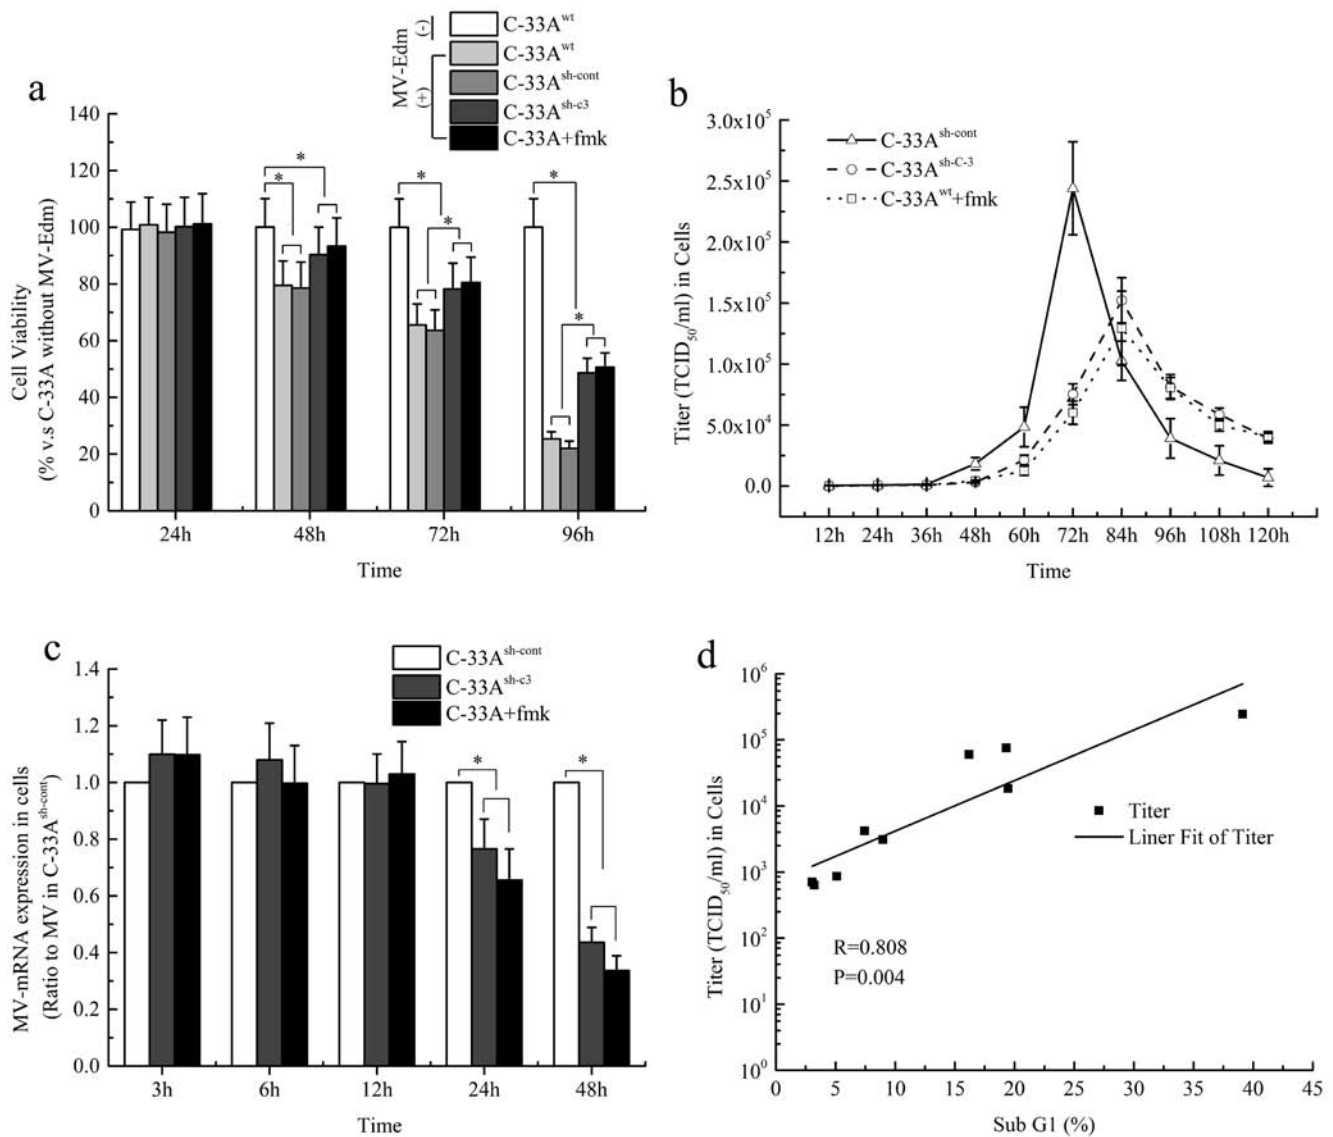

**Supplementary Figure S3: Role of Caspase-3 in the cell death induced by MV-Edm and the MV-Edm replication in C-33A cells.** **a.** At indicated times, the cell viability of each group was assessed with MTS assay. **b.** the intracellular virus replication of C-33A cells, expressed as TCID<sub>50</sub>/ml, was determined at different times after infection at an MOI of 1. **c.** The viral mRNA levels were measured using real-time PCR. Each value is normalized to that in C-33A cells transfected with empty vector (C-33A<sup>sh-cont</sup>), which was set a ratio = 1, and represented with mean ± SD. **d.** Liner Fit curve between cellular apoptosis and virus production. \*means  $P < 0.05$ .

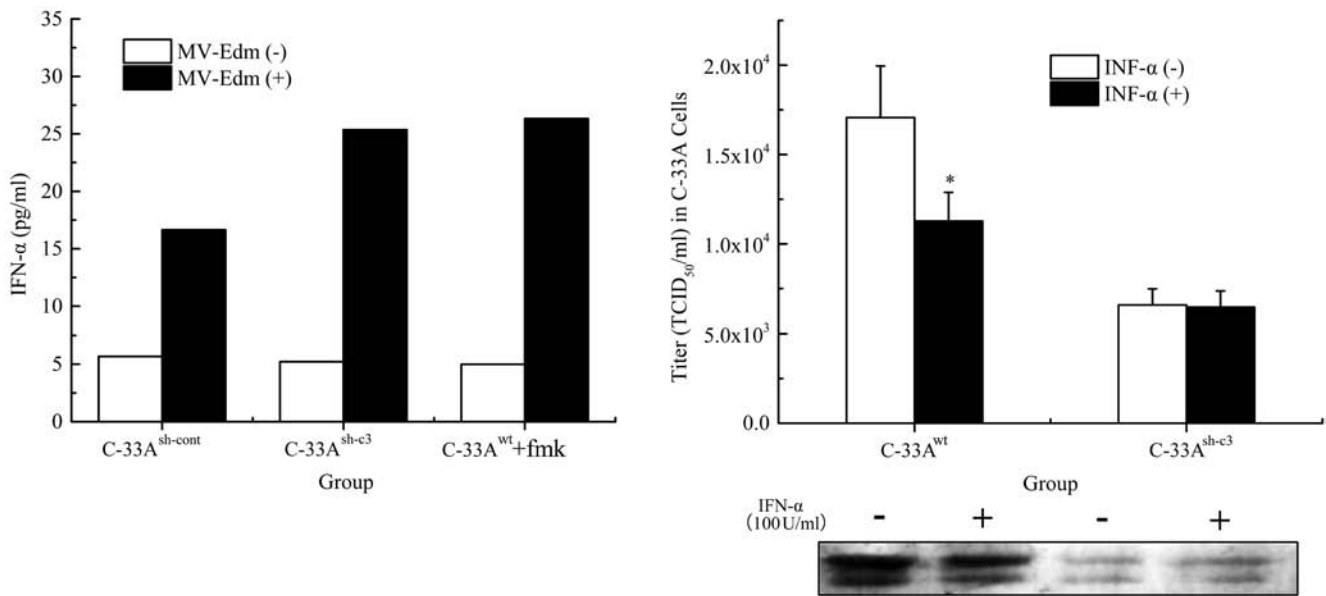

**Supplementary Figure S4: Regulation of MV-Edm induced IFN- $\alpha$  release and virus production by caspase 3 in C-33A cells.** **a.** After 48-hour infection, the production of IFN- $\alpha$  in C-33A cells was determined using human IFN- $\alpha$  enzyme-linked immunosorbent assay kit. **b.** The intracellular virus replication and the expression of cleaved caspase 3 in C-33A cells co-treated with or without IFN- $\alpha$  were compared at different 48 hours after infection at an MOI of 1. Data were presented as means  $\pm$  SD. \*means  $P < 0.05$ .
